# Supplementary material
Source: MDPI journal article supplement (https://www.mdpi.com/1996-1073/14/23/7870)
Supplement: s1 [file s1]

# Tin Oxide modified Titanium Dioxide as Electron Transport Layer in Formamidinium-Rich Perovskite Solar Cells

R. K. Koech<sup>1,2,3</sup>, Reisa Ichwani<sup>1,4</sup>, D. O. Oyewole<sup>1,4</sup>, M. Kigozi<sup>2</sup>, D. Amune<sup>2</sup>, D.M Sanni<sup>5</sup>, S. A. Adeniji<sup>5</sup>, O. K. Oyewole<sup>1,4</sup>, A. Bello<sup>2</sup>, E. Ntsoenzok<sup>6</sup> and W. O. Soboyejo<sup>1,4,7,\*</sup>

- 1 Department of Mechanical Engineering, Worcester Polytechnic Institute, 100 Institute Road, Worcester, MA 01609, USA.
- 2 Department of Materials Science and Engineering, African University of Science and Technology, Km. 10 Airport Road, Abuja, Nigeria.
- 3 Department of Mathematics, Physics and computing, Moi University, P.O Box 3900-30100, Eldoret, Kenya.
- 4 Program in Materials Science and Engineering, Department of Mechanical Engineering, Worcester Polytechnic Institute, 100 Institute Road, Worcester, MA 01609, USA.
- 5 Department of Theoretical and Applied Physics, African University of Science and Technology, Km 10 Airport Road, Abuja, Nigeria
- 6 CEMHTI-CNRS Site Cyclotron, 3A rue de la f  r  lerie, 45071 Orl  ans, France.
- 7 Department of Biomedical Engineering, Worcester Polytechnic Institute, 60 Prescott Street, Gateway Park Life Sciences and Bioengineering Center, Worcester, MA 01609, USA.

\* Correspondence: [wsoboyejo@wpi.edu](mailto:wsoboyejo@wpi.edu)

### Cross-sectional EDS spectra of the ETL

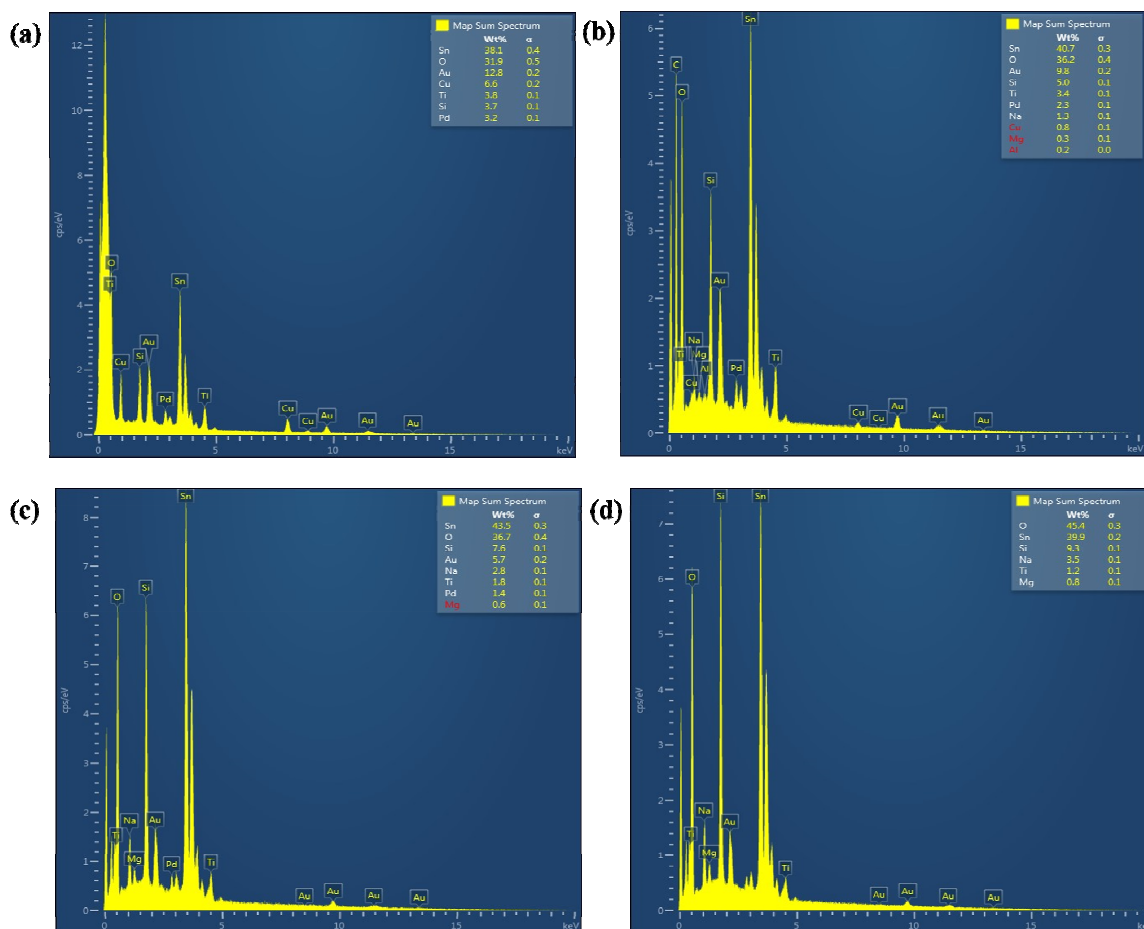

Figure S1: EDS spectra of ETL films for (a)  $\text{TiO}_2$  and  $\text{SnO}_2\text{-TiO}_2$  with (b) 0.1 (c) 0.2 (d) 0.3 proportion of  $\text{SnO}_2$

### Optical and electrical properties

Table S1: Bandgap and electrical conductivity of the ETL at different  $\text{SnO}_2$  content

| $\text{SnO}_2$ Proportion                         | 0                | 0.1              | 0.2              | 0.3              |
|---------------------------------------------------|------------------|------------------|------------------|------------------|
| Band gap (eV)                                     | $3.58 \pm 0.030$ | $3.59 \pm 0.027$ | $3.62 \pm 0.046$ | $3.70 \pm 0.059$ |
| Conductivity, $\sigma$ ( $\times 10^{-4}$ ) (S/m) | $1.27 \pm 0.69$  | $2.81 \pm 0.81$  | $2.83 \pm 0.81$  | $1.37 \pm 0.34$  |

## TRPL Fitting parameters

Table S2: TRPL Bi-exponential fitting parameters

| Vol. fraction of SnO <sub>2</sub> | 0             | 0.1           | 0.2           | 0.3           |
|-----------------------------------|---------------|---------------|---------------|---------------|
| A1                                | 0.650 ± 0.016 | 0.676 ± 0.037 | 1.646 ± 0.037 | 1.476 ± 0.028 |
| t1                                | 2.774 ± 0.133 | 2.926 ± 0.129 | 0.541 ± 0.013 | 0.636 ± 0.022 |
| A2                                | 0.322 ± 0.016 | 0.245 ± 0.020 | 0.20 ± 0.008  | 0.255 ± 0.025 |
| t2                                | 16.38 ± 0.761 | 13.47 ± 0.82  | 3.97 ± 0.136  | 2.63 ± 0.149  |

Table S3: PV **performance** parameters of PSCs with different SnO<sub>2</sub> proportion in the ETL

| Vol. fraction of SnO <sub>2</sub>     | 0                  | 0.1                | 0.2                   | 0.3                 |
|---------------------------------------|--------------------|--------------------|-----------------------|---------------------|
| V <sub>oc</sub> (V)                   | 1.02 (1.01±0.019)  | 1.01 (0.994±0.011) | 1.02 (1.00±0.016)     | 0.992 (0.967±0.018) |
| J <sub>sc</sub> (mA/cm <sup>2</sup> ) | 23.84 (22.39±1.41) | 24.46 (23.61±0.68) | 24.85 (23.9±0.81)     | 24.44 (23.33±1.06)  |
| FF (%)                                | 74.48 (69.71±3.81) | 74.49 (69.79±3.14) | 75.91 (70.55±3.59)    | 68.68 (65.58±4.14)  |
| <b>PCE</b> (%)                        | 18.18 (15.79±1.64) | 18.29 (16.39±1.01) | 18.78 (17.06.09±1.03) | 16.03 (14.784±0.94) |
